# Supplementary material for: In situ synthesis of hierarchical CoFe2O4 nanoclusters/graphene aerogels and their high performance for lithium-ion batteries
Source: Royal Society of Chemistry journal article supplement (doi:10.1039/c5cp04628a), 2015-01-01
Supplement: c5cp04628a1.pdf [file c5cp04628a1.pdf]

## Electronic Supplementary Information

### **In situ synthesis of hierarchical CoFe<sub>2</sub>O<sub>4</sub> nanoclusters/graphene aerogels and their high performance for lithium-ion batteries**

Beibei Wang<sup>a</sup>, Gang Wang<sup>b</sup>, Zhengyuan Lv<sup>a</sup>, Hui Wang<sup>a\*</sup>

*<sup>a</sup>Key Laboratory of Synthetic and Natural Functional Molecule Chemistry (Ministry of Education), College of Chemistry & Materials science, Northwest University, Xi'an 710069, PR China*

*<sup>b</sup>National Key Laboratory of Photoelectric Technology and Functional Materials (Culture Base), National Photoelectric Technology and Functional Materials & Application International Cooperation Base, Institute of Photonics & Photon-Technology, Northwest University, Xi'an 710069, PR China*

\*Corresponding author:

Tel.: +86 29 8836 3115

Fax: +86 29 8830 3798

E-mail address: huiwang@nwu.edu.cn (H. Wang)

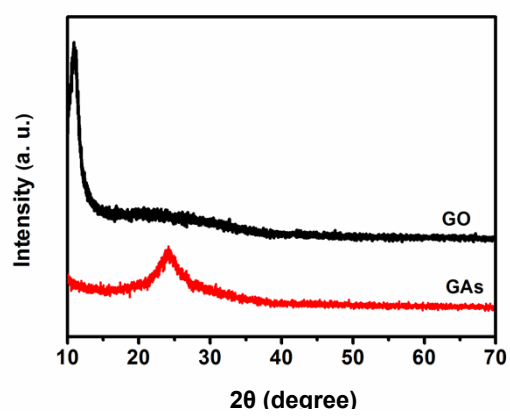

**Fig. S1** XRD patterns of GO and GAs.

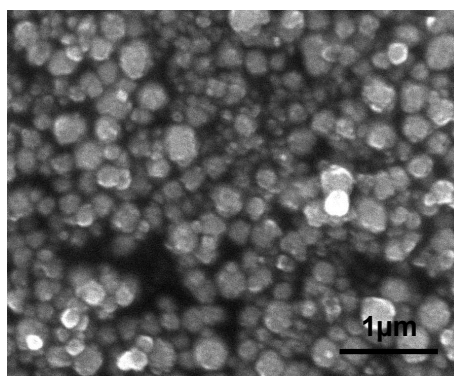

**Fig. S2** SEM image of  $\text{CoFe}_2\text{O}_4$  nanoclusters.

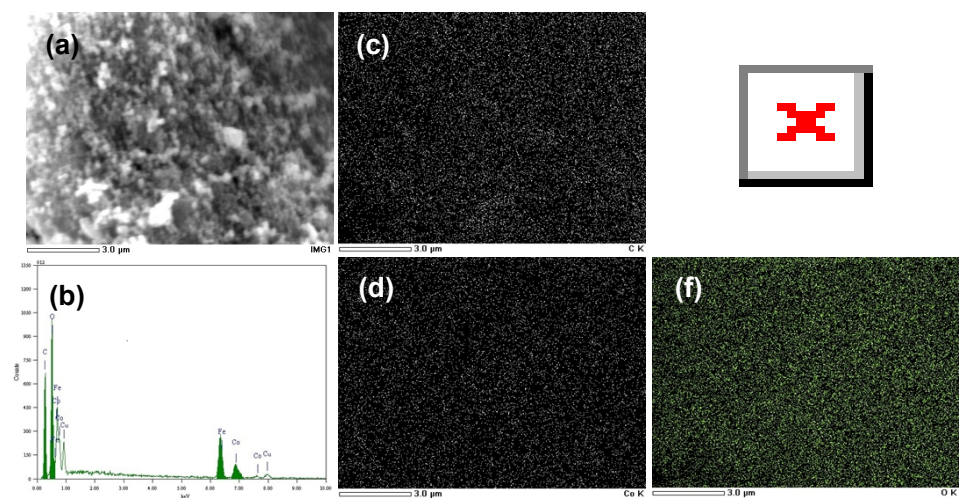

**Fig. S3** (a) A low magnification SEM image of CoFe<sub>2</sub>O<sub>4</sub>/GAs composite. (b) A typical EDS spectrum. (c-f) C, Fe, Co, and O elemental mappings.

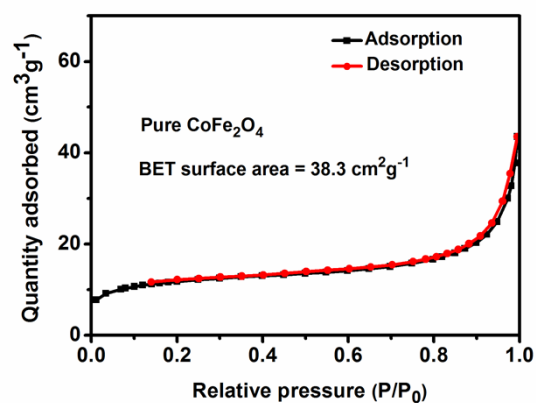

**Fig. S4** Nitrogen adsorption/desorption isotherms of CoFe<sub>2</sub>O<sub>4</sub> nanoclusters.

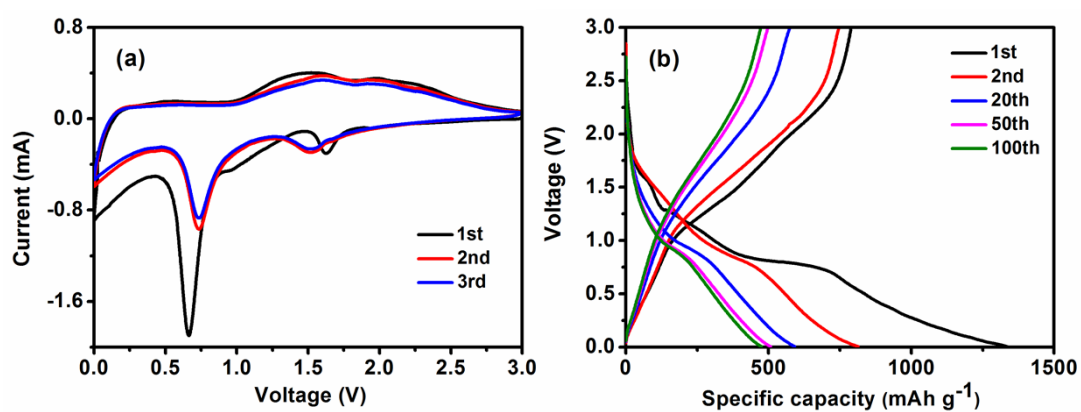

**Fig. S5** (a) CV profiles of CoFe<sub>2</sub>O<sub>4</sub> electrode at a scan rate of 0.1 mV s<sup>-1</sup>. (b) Discharge/charge profiles of CoFe<sub>2</sub>O<sub>4</sub> electrode.

**Table S1.** The general LIB performance of CoFe<sub>2</sub>O<sub>4</sub>/carbon anode materials.

| Materials                                             | Capacity (mAh/g)/cycle number<br>(current density (mA/g)) | Ref.      |
|-------------------------------------------------------|-----------------------------------------------------------|-----------|
| CoFe <sub>2</sub> O <sub>4</sub> /GAs                 | 1070/100(100)                                             | This work |
| CoFe <sub>2</sub> O <sub>4</sub> in carbon nanofibres | 705/200(100)                                              | [41]      |
| CoFe <sub>2</sub> O <sub>4</sub> /CNT                 | 910/50(0.15C)                                             | [42]      |
| CoFe <sub>2</sub> O <sub>4</sub> /N-doped graphene    | 800/240(0.1C)                                             | [43]      |
| Carbon@CoFe <sub>2</sub> O <sub>4</sub> /graphene     | 925.6/50(100)                                             | [44]      |
| CoFe <sub>2</sub> O <sub>4</sub> -graphene            | 1082/50(100)                                              | [30]      |
| CoFe <sub>2</sub> O <sub>4</sub> supported on XC-72   | 766/25(100)                                               | [45]      |
| CoFe <sub>2</sub> O <sub>4</sub> -RGO                 | 1040/30(100)                                              | [46]      |
| CoFe <sub>2</sub> O <sub>4</sub> /C                   | 200/90(100)                                               | [47]      |
